# Supplementary material for: Ultra-high energy density integrated polymer dielectric capacitors
Source: Royal Society of Chemistry journal article supplement (doi:10.1039/d1ta09045c), 2022-01-01
Supplement: d1ta09045c4.pdf [file d1ta09045c4.pdf]

## Supporting information

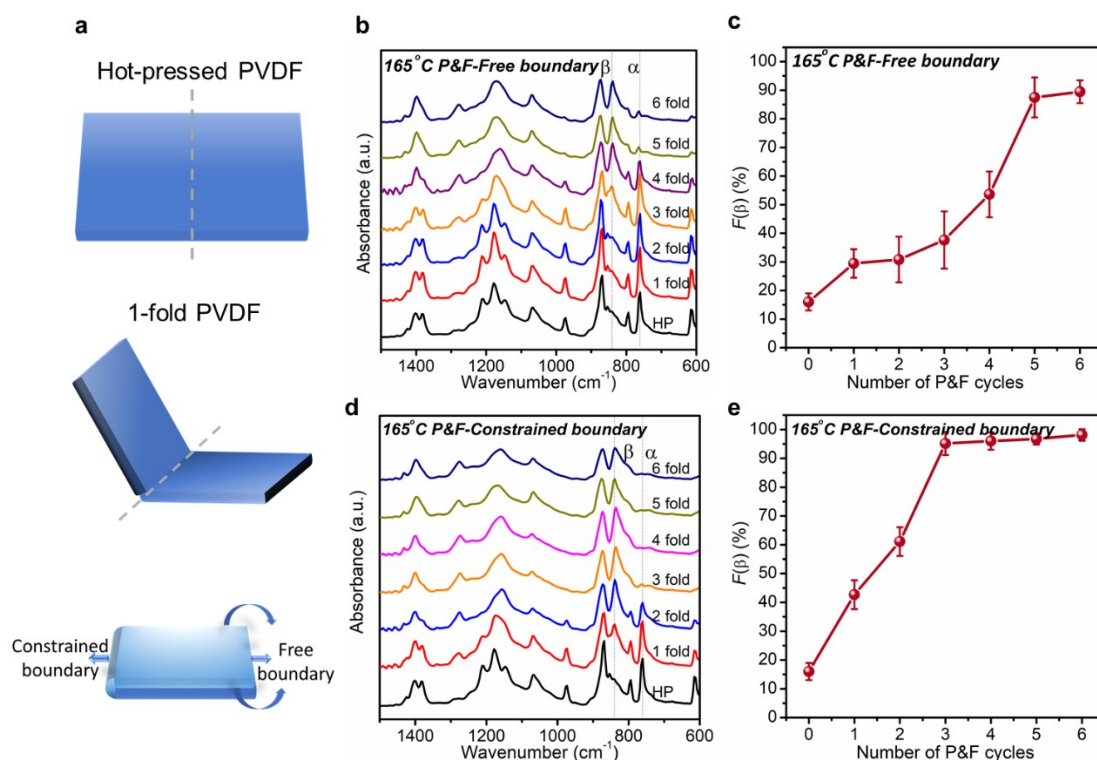

**Figure S1.** Comparison of  $\alpha$ - to  $\beta$ - phase transformation folded boundaries and free boundaries of "Press & Fold" (P&F) PVDF prepared at 165 °C. For further experimental details, refer to the previous papers.<sup>1, 2</sup> **a**, Schematic diagram of "fold", which produced different boundary conditions: folded with free boundaries. During each fold, 4 boundaries were generated, including 3 free boundaries and 1 folded boundary. All of the measurements were conducted close to the boundaries (within approximately 3 mm). 10 measurements were performed to reveal the homogeneity of the film. (**b** and **d**), FTIR spectra; (**c** and **e**),  $F(\beta)$  of PVDF P&F from 0 to 6 cycles for the "folded boundary" and "free boundary", respectively. From 1 to 4 P&F cycles, the "folded boundary" part of the film displayed higher  $\beta$ -phase content compared with the "free boundary" part for the same P&F cycle, suggesting the folded boundaries are more effective than "free boundary" in terms of phase transformation.

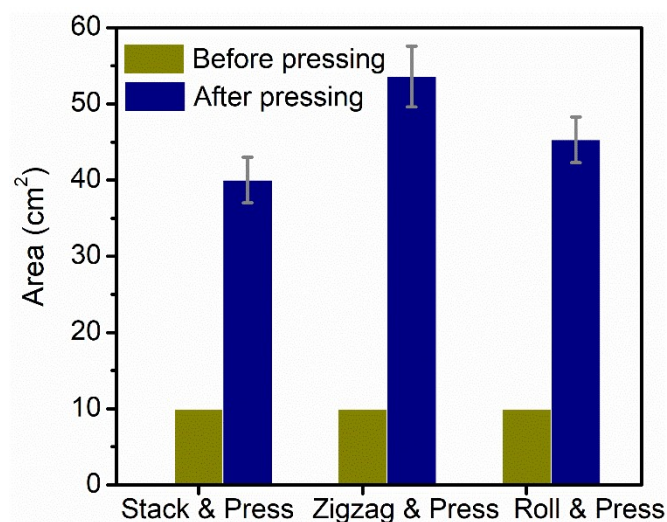

**Figure S2.** The measured area of multilayer PVDF with different boundary conditions before and after pressing. The larger area changes in Roll & Press and Zigzag & Press suggest folded boundaries are favourable for the stress transfer and enhance the local stress during pressing.

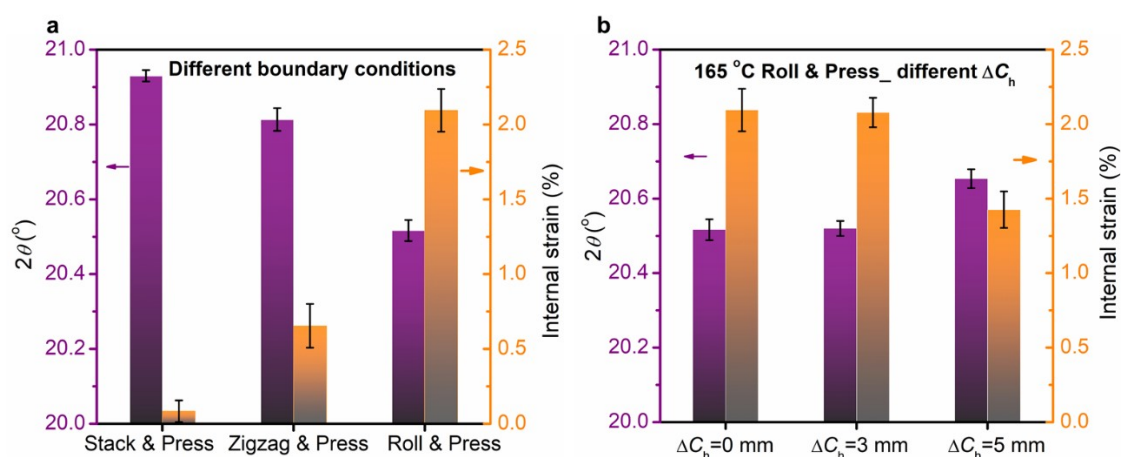

**Figure S3.** Comparison of  $(110/200)_\beta$  diffraction peak position  $2\theta$  and estimated internal strain: **a**, PVDF films with different boundary conditions including Stack & Press, Zigzag & Press and Roll & Press; **b**, Roll & Press PVDF films with  $\Delta C_h$  of 0, 3 mm and 5 mm.

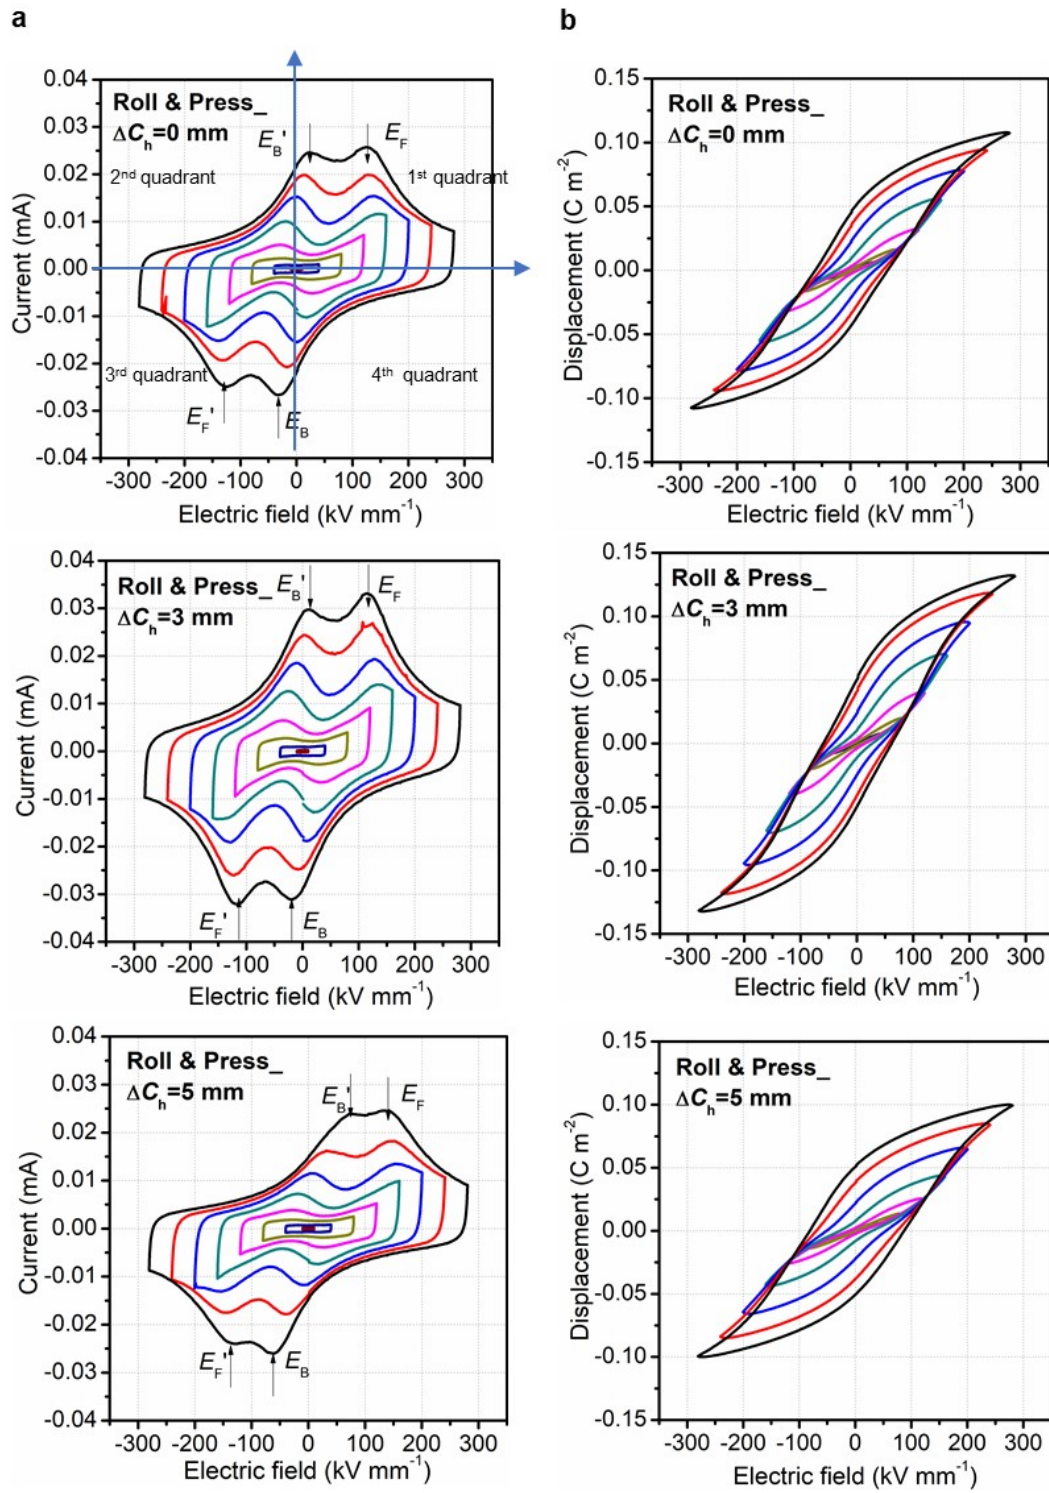

**Figure S4. a, I-E; b, D-E loops of Roll & Press films with  $\Delta C_h$  of 0, 3 mm and 5 mm.**



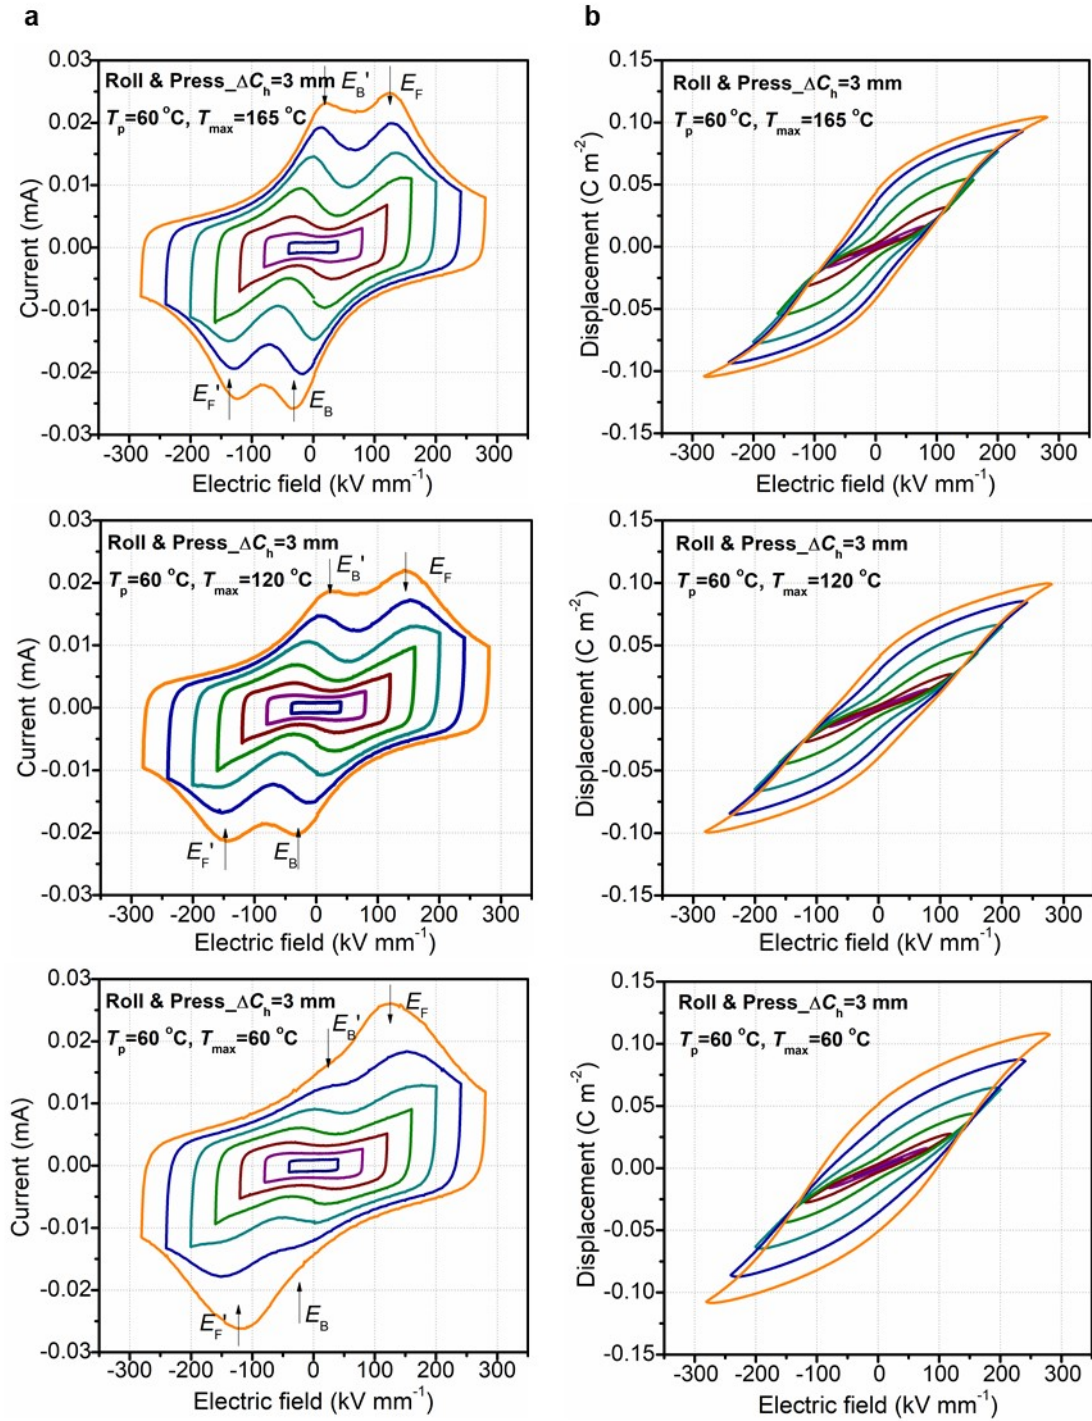

**Figure S5. a,  $I$ - $E$ ; b,  $D$ - $E$  loops of Roll & Press films with  $\Delta C_h$  of 3mm and at  $T_{\max}$  of 60 °C, 120 °C, 165 °C. Among this group of Roll & Press films, none of them showed stable relaxor-like ferroelectric behaviour. The reason is none of these films exhibited both high  $F(\beta)$  and high internal strain. For the Roll & Press film prepared at  $T_p$  of 60 °C and  $T_{\max}$  of 165 °C, although the  $F(\beta)$  reached 90 % (FTIR), the internal strain was only 2.1 %. The internal strain increased to 4.3 % in film prepared at  $T_p$  of 60 °C and  $T_{\max}$  of 60 °C, but the  $F(\beta)$  decreased to 59 % (FTIR).**

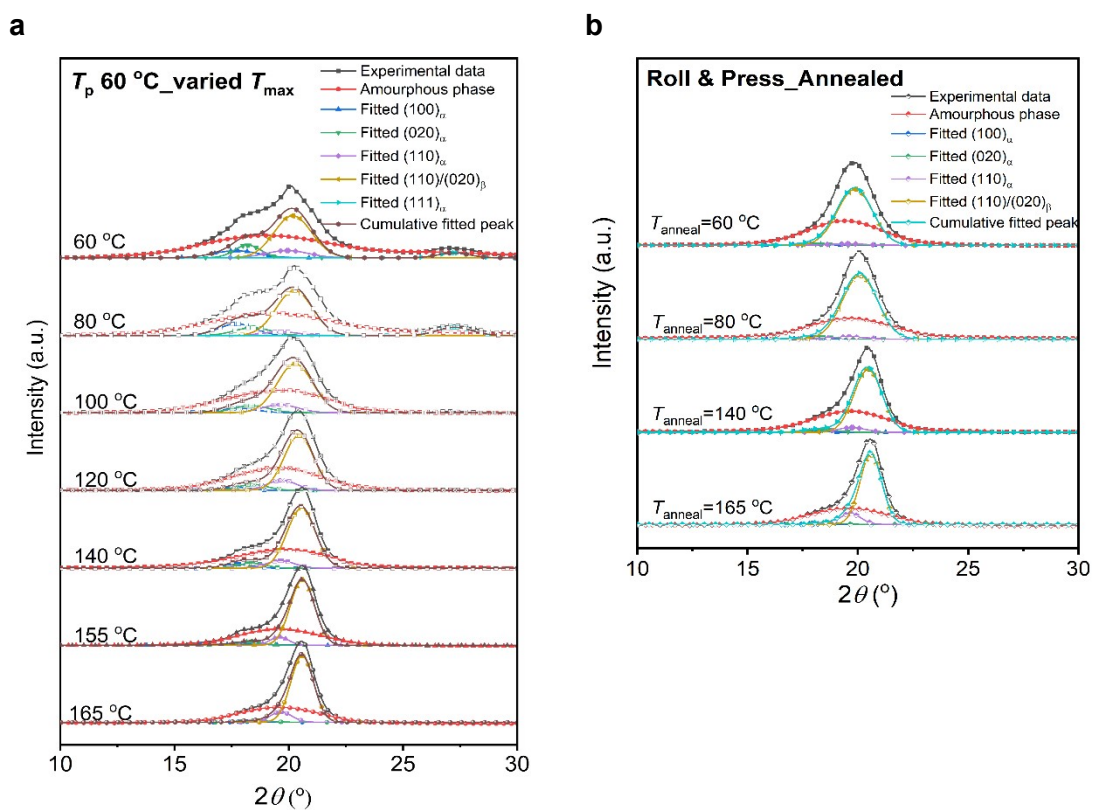

**Figure S6.** Deconvoluted XRD patterns for: **a**, Roll & Press PVDF film with  $\Delta C_h$  of 3 mm prepared at a constant  $T_p$  of 60 °C with  $T_{max}$  varying from 165 °C to 60 °C; **b**, Roll & Press PVDF films with  $\Delta C_h$  of 3mm prepared at  $T_p$  of 60 °C and  $T_{max}$  of 165 °C, followed by annealing at 165 °C, 140 °C, 80 °C and 60 °C. All the Gaussian-fitted results reached a coefficient of determination ( $R^2$ ) of 99.5 % relating to the experimental data.

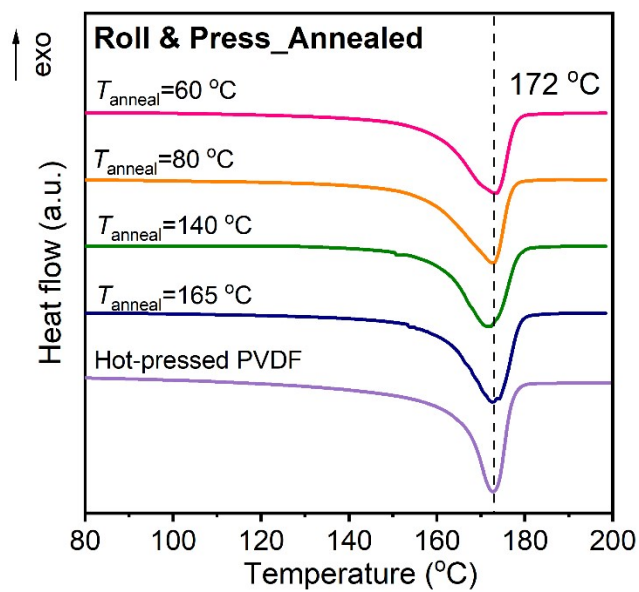

**Figure S7.** Comparison of DSC 1<sup>st</sup> heating curves for hot-pressed PVDF film and Roll & Press PVDF films with  $\Delta C_h$  of 3 mm prepared at  $T_p$  of 60 °C and  $T_{\text{max}}$  of 165 °C, followed by annealing at 165 °C, 140 °C, 80 °C and 60 °C.

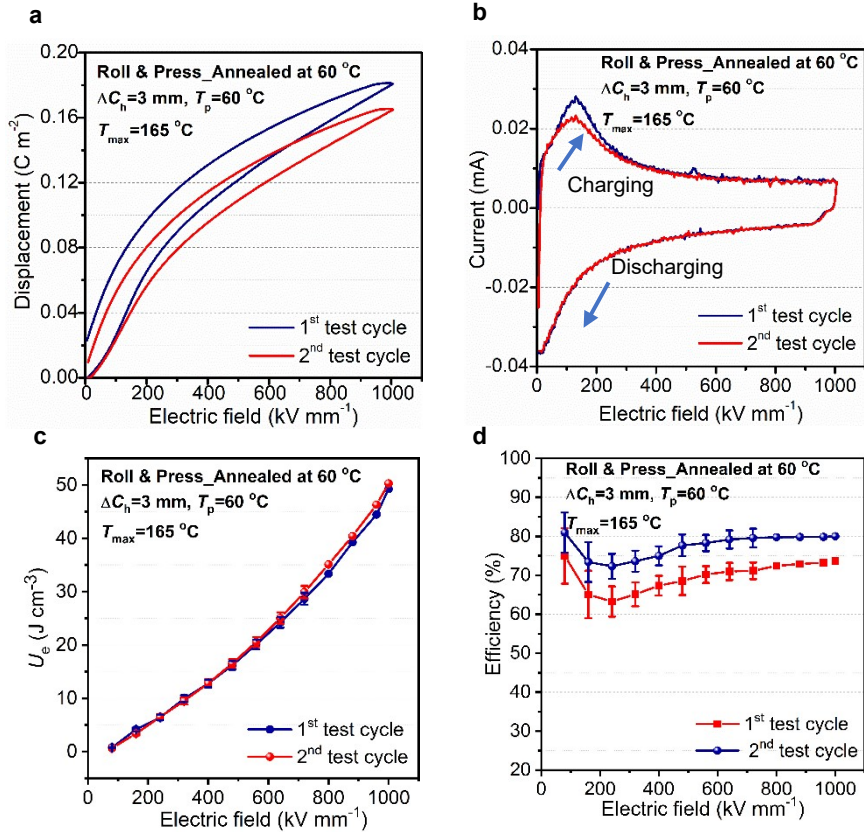

**Figure S8.** Ferroelectric properties of the 60 °C annealed Roll & Press film with  $\Delta C_h$  of 3 mm at high electric field were measured using two consecutive half-cycle (denoted as 1<sup>st</sup> and 2<sup>nd</sup>) triangular waveforms at 10 Hz: **a**, 1<sup>st</sup> cycle unipolar  $D$ - $E$  loops; **b**, Comparison of  $I$ - $E$  loops at 1000 kV mm<sup>-1</sup>; **c**,  $U_e$ ; **d**,  $\eta$  from 80 to 1000 kV mm<sup>-1</sup> for both 1<sup>st</sup> and 2<sup>nd</sup> cycles. During the first charging cycle, both reversible polar nanostructures and irreversible field-induced ferroelectric domains (originating from the small amount of  $\alpha$ - $\beta$  phase transition) contributed to the maximum electric field induced displacement  $D_{in-max}$ . As a result, higher  $D_{in}$  and  $D_r$  were observed in the 1<sup>st</sup> cycles  $D$ - $E$  loops compared with the 2<sup>nd</sup> cycles (Figure 3c) at the same electric field. During the first discharging cycle, the reversible polar structure mainly contributed to the discharged energy density because most of the ferroelectric domains cannot switch back to their original state, which results in high energy loss. When the test was repeated at the same electric field for more cycles, the charge-discharge efficiency gradually increased because some of the field induced and aligned ferroelectric domains tended to become inactive (also shown in Figure S14). This is confirmed by reduced peak intensity in the  $I$ - $E$  loop for the 2<sup>nd</sup> test cycle during charging. Therefore, the  $\eta$  increased from 74 % to 80 % at 1000 kV mm<sup>-1</sup> during 2<sup>nd</sup> cycle, as a result of the suppressed irreversible polarisation. Therefore, during the repetitive operations of the Roll & Press PVDF under high fields, the energy storage efficiency is higher than the value measured during the first charge-discharge cycle, which is desirable considering the long service life of dielectric capacitors.



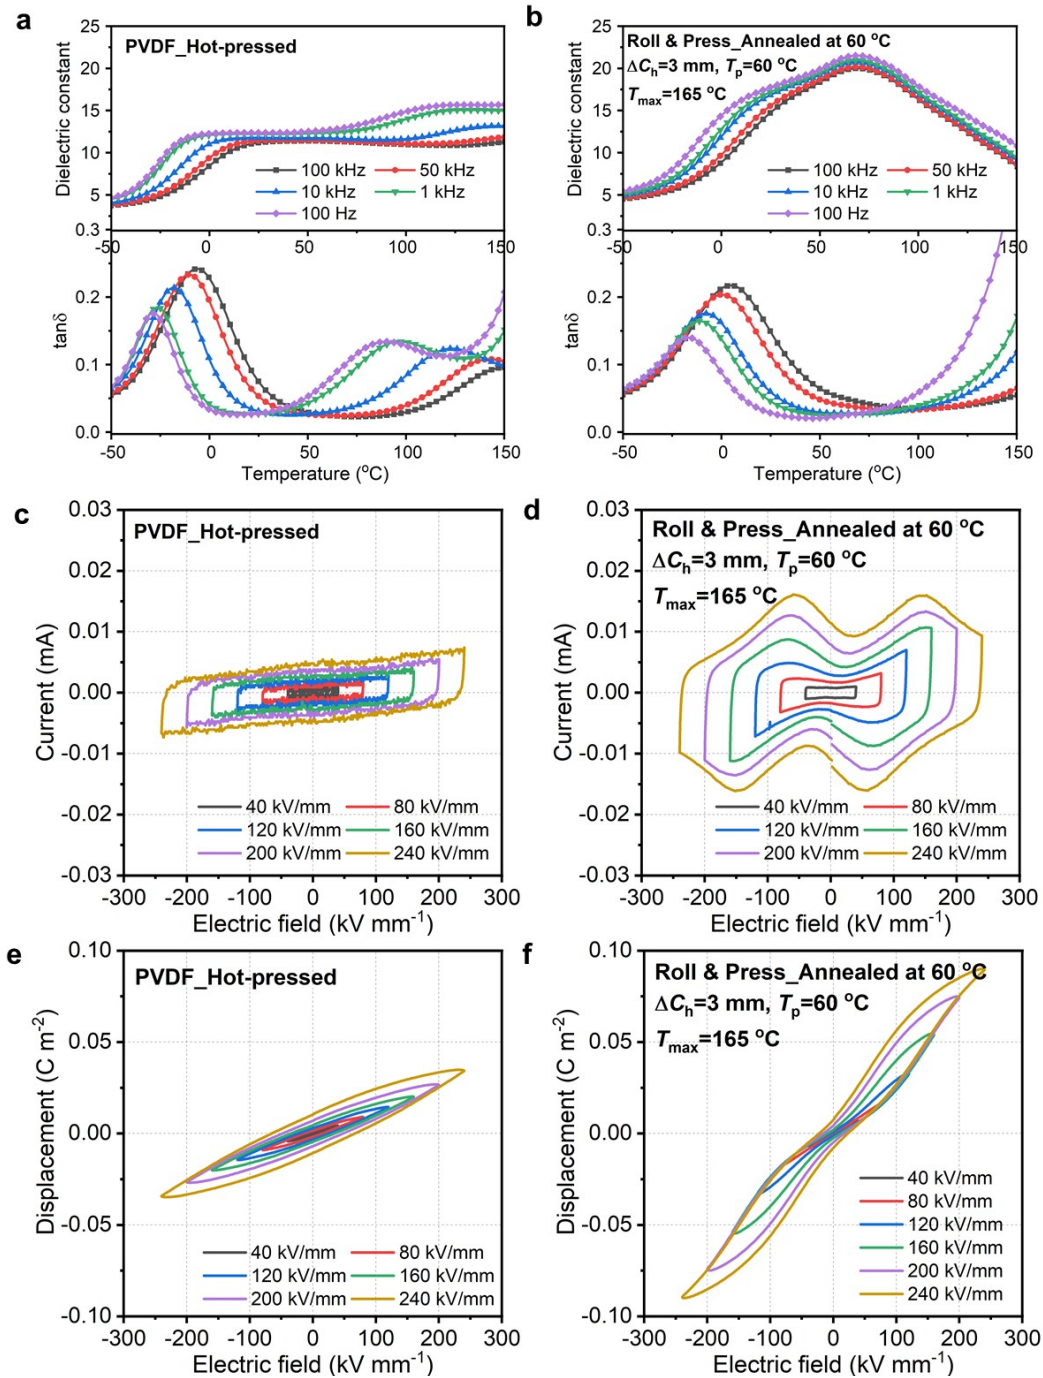

**Figure S9.** Comparison of dielectric and ferroelectric properties for hot-pressed PVDF film and 60 °C annealed Roll & Press PVDF film with  $\Delta C_h$  of 3 mm: **a** and **b**, temperature dependent dielectric constant/loss spectra; **c** and **d**,  $I$ - $E$  loops from 40 to 240 kV mm<sup>-1</sup>; **e** and **f**,  $D$ - $E$  loops from 40 to 240 kV mm<sup>-1</sup>. The comparison was done at 240 kV mm<sup>-1</sup> due to the limit of high voltage power supply (maximum: 10 kV) and the practical difficulty in achieving thin hot-pressed PVDF film (< 40  $\mu$ m) because of the polymer's high viscosity. The Roll & Press PVDF film exhibited enhanced properties in both low-field dielectric constant ( $\epsilon_r$ ) and high-field induced displacement ( $D_{in}$ ). A remarkable change was found in the **a** and **b**, where the high temperature  $\alpha_c$  relaxation (75 - 150 °C) observed in the hot-pressed PVDF was replaced by a



broad frequency-independent peak around 73 °C with a higher  $\epsilon_r$  of 20.5 in Roll & Press PVDF film, indicating the thermal energy enhanced the mobility of dipoles in the Roll & Press PVDF film. The dipole mobility reached the maximum at  $\sim 73$  °C and then started decreasing afterwards.

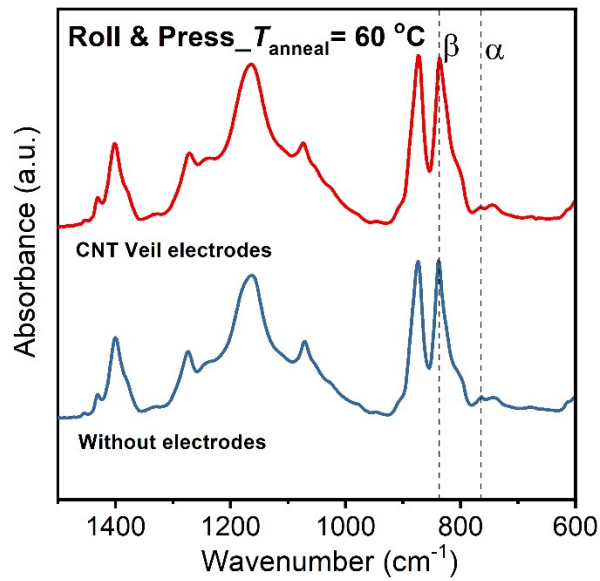

**Figure S10.** FTIR spectra of the assembled capacitor with CNT Veil electrodes ( $T_p = 60\text{ °C}$ ,  $T_{\max} = 165\text{ °C}$ ,  $T_{\text{anneal}} = 60\text{ °C}$ ) and its corresponding neat Roll & Press PVDF film under the same conditions. The calculated  $F(\beta)$  for the above two films are  $95 \pm 2\%$  and  $94 \pm 3\%$ , respectively. These results demonstrate that adding the conductive CNT Veil layer did not affect the phase transformation during Roll & Press.

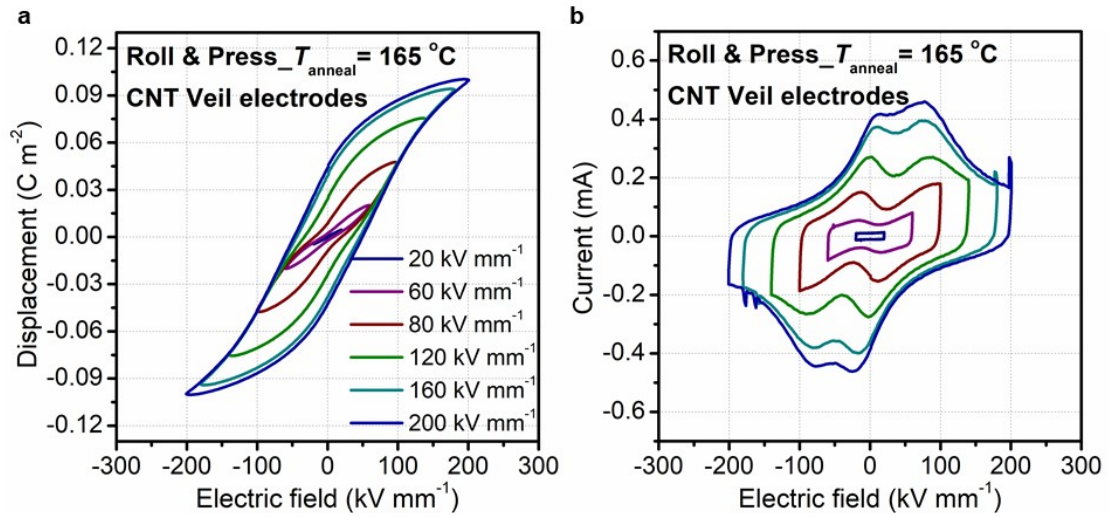

**Figure S11. a,  $I$ - $E$ ; b,  $D$ - $E$  loops up to 200 kV mm<sup>-1</sup> for the assembled capacitor with CNT Veil electrodes ( $T_p = 60$  °C,  $T_{max} = 165$  °C) followed by annealing at 165 °C. As revealed by the emerging current peaks ( $E_B$  and  $E_F'$ ,  $E_B'$  and  $E_F$ ), and high  $D_r$ , the reversible polar nanostructure is not stable at high fields.**

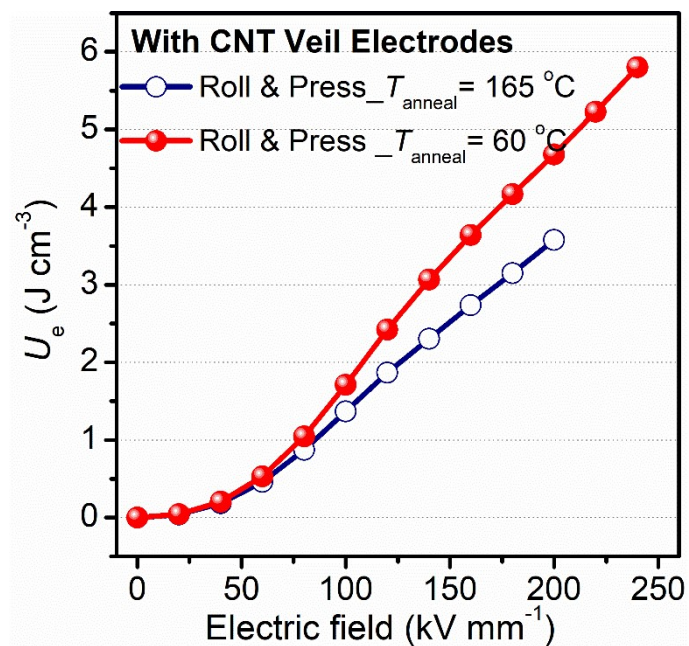

**Figure S12.** Comparison of discharged energy density  $U_e$  for the assembled capacitor prepared with annealing at 165 and 60 °C.

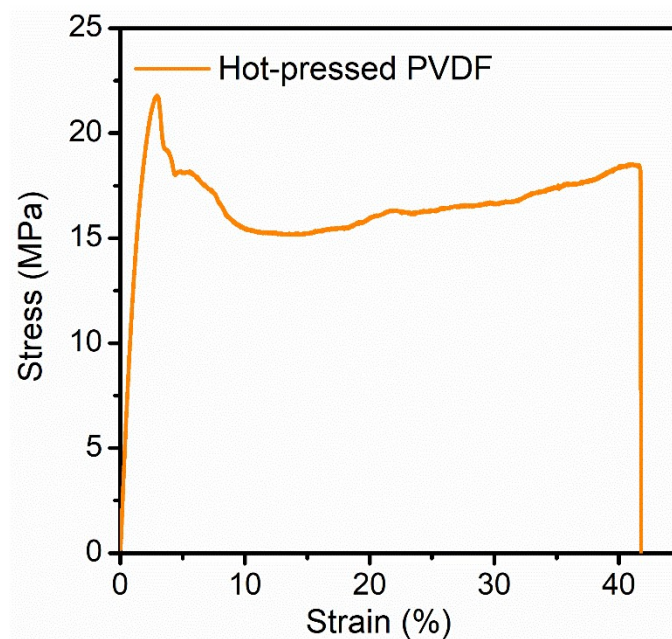

**Figure S13.** Tensile stress-strain curve of hot-pressed PVDF film.



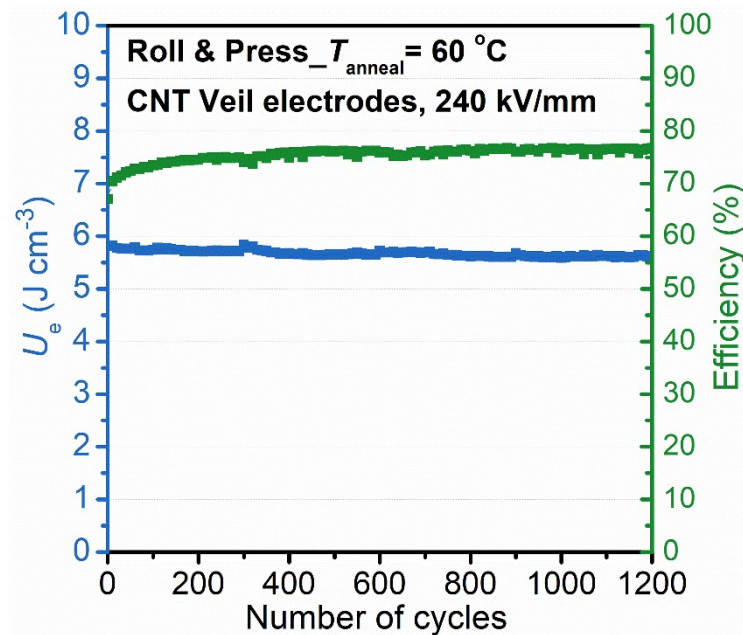

**Figure S14.** Discharged energy density ( $U_e$ ) and charge-discharge efficiency of Roll & Press PVDF/CNT veil device over 1200 cycles of  $D-I-E$  tests. To evaluate the long-term energy storage performance of the PVDF/CNT veil device under the fast charge-discharge operation condition, unipolar  $D-I-E$  loop measurement was repeated 1200 times using the same sample at room temperature,  $240 \text{ kV mm}^{-1}$ , and  $10 \text{ Hz}$ . Due to the data storage limitation of the software for each file (maximum 30 data sets), the repetitive  $D-I-E$  loops recorded every 10 cycles, and 120 sets of data were obtained to show the performance trend. Based on the experiment results, the  $U_e$  is stable over the whole test period ( $5.67 \pm 0.05 \text{ J cm}^{-3}$ ). The charge-discharge efficiency experienced an increase from  $66.2 \%$  to  $75.8 \%$  during the first 400 cycles and then stabilised hereafter. The average efficiency over the whole test period is  $75.4 \pm 1.6 \%$  ascribing to the stabilised polar nanostructures at high electric fields. Overall, the device demonstrated stable energy storage performance during long-term repetitive charge-discharge process.

**Table S1.** Comparison of crystalline phase compositions and relevant parameters for Roll & Press PVDF with  $\Delta C_h$  of 3 mm at  $T_p$  of 60 °C and  $T_{max}$  from 165 to 60 °C.

| $T_{max}$<br>(°C) | $T_{anneal}$ (°C) | Phase composition  |                   | $(110/200)_\beta$    |                        |                          |
|-------------------|-------------------|--------------------|-------------------|----------------------|------------------------|--------------------------|
|                   |                   | $F(\alpha)$<br>(%) | $F(\beta)$<br>(%) | Peak position<br>(°) | Internal strain<br>(%) | crystallite size<br>(nm) |
| 165               | 165               | 15                 | 85                | $20.55 \pm 0.03$     | $2.1 \pm 0.2$          | $6.3 \pm 0.2$            |
| 155               | 155               | 17                 | 83                | $20.56 \pm 0.02$     | $2.1 \pm 0.1$          | $6.2 \pm 0.2$            |
| 140               | 140               | 20                 | 80                | $20.49 \pm 0.04$     | $2.4 \pm 0.2$          | $5.3 \pm 0.2$            |
| 120               | 120               | 17                 | 83                | $20.39 \pm 0.02$     | $2.8 \pm 0.1$          | $4.6 \pm 0.1$            |
| 100               | 100               | 23                 | 77                | $20.25 \pm 0.03$     | $3.5 \pm 0.2$          | $4.1 \pm 0.2$            |
| 80                | 80                | 32                 | 68                | $20.20 \pm 0.03$     | $3.8 \pm 0.2$          | $4.0 \pm 0.2$            |
| 60                | 60                | 34                 | 66                | $20.12 \pm 0.04$     | $4.3 \pm 0.1$          | $3.8 \pm 0.2$            |
| 165               | 140               | 14                 | 86                | $20.43 \pm 0.02$     | $2.6 \pm 0.2$          | $5.0 \pm 0.3$            |
| 165               | 80                | 7                  | 93                | $20.07 \pm 0.03$     | $4.5 \pm 0.2$          | $4.4 \pm 0.2$            |
| 165               | 60                | 6                  | 94                | $19.82 \pm 0.04$     | $5.9 \pm 0.2$          | $4.1 \pm 0.2$            |

**Table S2.** Comparison of polymer-based dielectric materials, including dielectric constant ( $\epsilon_r$ ) and dielectric loss ( $\tan \delta$ ) measured at low electric field at 1 kHz, and breakdown strength ( $E_b$ ), discharged energy density ( $U_e$ ), charge-discharge efficiency ( $\eta$ ) measured at high electric field.

| Material                                                                                   | $\epsilon_r$ | $\tan \delta$ | $E_b$<br>(kV<br>mm <sup>-1</sup> ) | $U_e$<br>(J cm <sup>-3</sup> ) | $\eta$<br>(%) | Ref. |
|--------------------------------------------------------------------------------------------|--------------|---------------|------------------------------------|--------------------------------|---------------|------|
| Linear dielectrics                                                                         |              |               |                                    |                                |               |      |
| Biaxially-oriented polypropylene (BOPP)                                                    | 2.3          | 0.0002        | 650                                | 4                              | 83            | 3    |
| Polypropylene (PP)                                                                         | 2.2          | 0.0002        | 600                                | 3.6                            | 80            | 4    |
| Polycarbonate (PC)                                                                         | 3.0          | 0.002         | 650                                | 5                              | 40            | 5    |
| Polyetherimide (PEI)                                                                       | 3.2          | 0.003         | 500                                | 3                              | N.A.          | 6    |
| Polyphenylene oxide (PPO)                                                                  | 2.8          | 0.001         | 900                                | 0.9                            | 85            | 3    |
| Dipolar glass dielectrics                                                                  |              |               |                                    |                                |               |      |
| Polyimide (PI)                                                                             | 3.2          | 0.01          | 450                                | 5.2                            | 90            | 7    |
| Aromatic Polythiourea (ArPTU)                                                              | 4.4          | 0.01          | 1000                               | 22                             | 92            | 8    |
| Poly(ether-ester-urethane) (PEEU)                                                          | 4.7          | 0.015         | 600                                | 8                              | 90            | 9    |
| Sulfonylated Polymer of Intrinsic Microporosity (SO <sub>2</sub> -PIM)                     | 6.0          | 0.005         | 770                                | 17                             | 90            | 10   |
| Sulfonylated Poly (ether ether ketone) (PEEK-SO <sub>2</sub> )                             | 5.0          | 0.01          | 300                                | 2.35                           | 90            | 11   |
| Sulfonylated Poly (2,6-dimethyl-1,4-phenylene oxide) (SO <sub>2</sub> -PPO <sub>25</sub> ) | 5.9          | 0.003         | 800                                | 22                             | 92            | 12   |
| poly(2-(methylsulfonyl) ethyl methacrylate) (PMSEMA)                                       | 11.4         | 0.02          | 270                                | 5.7                            | 80            | 13   |
| Meta-aromatic polyurea (META-PU)                                                           | 5.8          | 0.01          | 670                                | 13                             | 91            | 14   |
| PVDF-based pure polymers                                                                   |              |               |                                    |                                |               |      |
| PVDF                                                                                       | 12           | 0.05          | 600                                | 12.5                           | 56            | 15   |
| PVDF stretched (500 % strain)                                                              | 12           | 0.05          | 800                                | 27.1                           | 68            | 16   |
| PVDF-CTFE                                                                                  | 13           | 0.03          | 600                                | 25                             | N.A.          | 17   |
| PVDF-HFP                                                                                   | 10           | 0.03          | 600                                | 13.5                           | 55            | 18   |
| PVDF-HFP stretched (500 % strain)                                                          | 12           | 0.05          | 900                                | 27.7                           | 65            | 16   |
| PVDF-HFP stretched (800 % strain)                                                          | 13           | 0.04          | 660                                | 20                             | 71            | 19   |

|                                                                     |      |       |     |      |      |    |
|---------------------------------------------------------------------|------|-------|-----|------|------|----|
| PVDF-TRFE-CTFE                                                      | 60   | 0.1   | 500 | 13   | 60   | 20 |
| PVDF-TRFE-CFE                                                       | 53   | 0.07  | 490 | 11.3 | 52   | 15 |
| PTFE-HFP-VDF                                                        | 6    | 0.01  | 600 | 6    | 95   | 21 |
| PVDF-based polymer blends                                           |      |       |     |      |      |    |
| PVDF-TRFE-CFE/PVDF                                                  | 29   | 0.05  | 640 | 19.6 | 60   | 15 |
| P(VDF-HFP)/P(VDF-TrFE-CFE) multilayers                              | 16   | N.A.  | 600 | 20   | 85   | 22 |
| PVDF-HFP/PVDF-TrFE-CTFE                                             | 29   | 0.06  | 600 | 21.9 | 63   | 23 |
| PVDF-HFP/PMMA/PC                                                    | 4.7  | 0.02  | 600 | 8.4  | 60   | 24 |
| PVDF/PC                                                             | 4.5  | 0.01  | 800 | 15   | N.A. | 25 |
| PVDF-HFP/PET/PMMA                                                   | 5    | 0.01  | 800 | 17.4 | N.A. | 26 |
| PVDF-TRFE-CTFE/ArPTU                                                | 11.3 | 0.01  | 700 | 19.2 | 85   | 27 |
| PVDF-HFP/PMMA                                                       | 6.5  | 0.025 | 475 | 11.2 | 85   | 28 |
| PVDF-HFP/PC multilayer                                              | 3    | 0.005 | 460 | N.A. | 90   | 29 |
| PVDF-HFP/PC blends 10/90                                            | 3.5  | 0.005 | 500 | N.A. | 87   | 29 |
| PVDF-based nanocomposites                                           |      |       |     |      |      |    |
| PVDF-HFP/BaTiO <sub>3</sub> @TiO <sub>2</sub> _nanofibre            | 20   | 0.04  | 800 | 31.2 | 78   | 30 |
| PVDF-HFP/BaTiO <sub>3</sub> _nanoparticle                           | 11   | 0.05  | 650 | 20.6 | 74   | 31 |
| PVDF/BaTiO <sub>3</sub> _nanoparticle/Titanite coupling agent       | 12   | 0.04  | 517 | 11.2 | 62   | 32 |
| PVDF/Ba <sub>0.2</sub> Sr <sub>0.8</sub> TiO <sub>3</sub> _nanowire | 17.5 | N.A.  | 450 | 14.8 | 61   | 33 |
| PVDF/BaTiO <sub>3</sub> @sheet-likeTiO <sub>2</sub>                 | 21   | 0.05  | 490 | 17.6 | N.A. | 34 |
| PVDF/BaTiO <sub>3</sub> sandwich structure                          | 17   | 0.04  | 470 | 18.8 | 65   | 35 |
| PVDF/BaTiO <sub>3</sub> sandwich structure                          | 11   | 0.04  | 410 | 16.2 | 70   | 36 |
| PVDF-HFP/BaTiO <sub>3</sub> sandwich structure                      | 11.5 | 0.04  | 526 | 26.4 | 72   | 37 |
| PVDF-TRFE-CFE/Boron Nitride Nanosheet (BNNS)                        | 38   | 0.03  | 650 | 22.3 | 77   | 38 |
| PVDF/CaNbO <sub>3</sub>                                             | 10.5 | N.A.  | 792 | 36   | 61   | 39 |



**Table S3.** Comparison of melting temperature ( $T_m$ ), fusion enthalpy ( $\Delta H_m$ ), and calculated crystallinity ( $\chi$ ) for Roll & Press PVDF films with  $\Delta C_h$  of 3 mm prepared at  $T_p$  of 60 °C and  $T_{max}$  of 165 °C, followed by annealing at 165 °C, 140 °C, 80 °C and 60 °C. Hot-pressed PVDF films were measured as references. All data were collected during the first heating process.

| $T_{anneal}$ | First heating |                    |            |
|--------------|---------------|--------------------|------------|
|              | $T_m$ (°C)    | $\Delta H_m$ (J/g) | $\chi$ (%) |
| 60 °C        | 172.5 ± 1     | 39 ± 1             | 38 ± 1     |
| 80 °C        | 172.5 ± 1     | 38 ± 3             | 37 ± 3     |
| 140 °C       | 171.6 ± 1     | 41 ± 2             | 39 ± 2     |
| 165 °C       | 172.3 ± 1     | 46 ± 2             | 44 ± 2     |
| Hot-pressed  | 172.5 ± 1     | 48 ± 2             | 46 ± 2     |

## Reference

1. X. Ren, N. Meng, H. Zhang, J. Wu, I. Abrahams, H. Yan, E. Bilotti and M. J. Reece, *Nano Energy*, 2020, **72**, 104662.
2. N. Meng, X. Ren, G. Santagiuliana, L. Ventura, H. Zhang, J. Wu, H. Yan, M. J. Reece and E. Bilotti, *Nature Communications*, 2019, **10**, 4535.
3. Q. Chen, Y. Wang, X. Zhou, Q. M. Zhang and S. Zhang, *Appl. Phys. Lett.*, 2008, **92**, 142909.
4. G. Zhang, D. Brannum, D. Dong, L. Tang, E. Allahyarov, S. Tang, K. Kodweis, J.-K. Lee and L. Zhu, *Chem. Mater.*, 2016, **28**, 4646-4660.
5. Q. Li, L. Chen, M. R. Gadinski, S. Zhang, G. Zhang, H. U. Li, E. Iagodkine, A. Haque, L.-Q. Chen, T. N. Jackson and Q. Wang, *Nature*, 2015, **523**, 576-579.
6. J. Ho and R. Jow, *Characterization of high temperature polymer thin films for power conditioning capacitors*, ARMY RESEARCH LAB ADELPHI MD SENSORS AND ELECTRON DEVICES DIRECTORATE, 2009.
7. P. Hu, W. Sun, M. Fan, J. Qian, J. Jiang, Z. Dan, Y. Lin, C.-W. Nan, M. Li and Y. Shen, *Appl. Surf. Sci.*, 2018, **458**, 743-750.
8. S. Wu, W. Li, M. Lin, Q. Burlingame, Q. Chen, A. Payzant, K. Xiao and Q. M. Zhang, *Adv. Mater.*, 2013, **25**, 1734-1738.
9. T. Zhang, X. Chen, Y. Thakur, B. Lu, Q. Zhang, J. Runt and Q. M. Zhang, *Science Advances*, 2020, **6**, eaax6622.
10. Z. Zhang, J. Zheng, K. Premasiri, M.-H. Kwok, Q. Li, R. Li, S. Zhang, M. H. Litt, X. P. A. Gao and L. Zhu, *Materials Horizons*, 2020, **7**, 592-597.
11. J. Wei, T. Ju, W. Huang, J. Song, N. Yan, F. Wang, A. Shen, Z. Li and L. Zhu, *Polymer*, 2019, **178**, 121688.
12. Z. Zhang, D. H. Wang, M. H. Litt, L. S. Tan and L. Zhu, *Angew. Chem.*, 2018, **130**, 1544-1547.
13. J. Wei, Z. Zhang, J.-K. Tseng, I. Treufeld, X. Liu, M. H. Litt and L. Zhu, *ACS Appl. Mater. Interfaces*, 2015, **7**, 5248-5257.
14. S. Wu, M. Lin, Q. Burlingame and Q. M. Zhang, *Appl. Phys. Lett.*, 2014, **104**, 072903.
15. X. Zhang, Y. Shen, Z. Shen, J. Jiang, L. Chen and C.-W. Nan, *ACS Appl. Mater. Interfaces*, 2016, **8**, 27236-27242.
16. W. Xia, Z. Zhou, Y. Liu, Q. Wang and Z. Zhang, *J. Appl. Polym. Sci.*, 2018, **135**, 46306.
17. X. Zhou, B. Chu, B. Neese, M. Lin and Q. M. Zhang, *ITDEI*, 2007, **14**, 1133-1138.
18. F. Guan, J. Pan, J. Wang, Q. Wang and L. Zhu, *Macromolecules*, 2010, **43**, 384-392.
19. M. Yuan, B. Li, S. Zhang, R. Rajagopalan and M. T. Lanagan, *ACS Applied Polymer Materials*, 2020, **2**, 1356-1368.
20. Z. Zhang and T. C. M. Chung, *Macromolecules*, 2007, **40**, 783-785.
21. S. Zhang, C. Zou, D. I. Kushner, X. Zhou, R. J. Orchard, N. Zhang and Q. M. Zhang, *ITDEI*, 2012, **19**, 1158-1166.
22. J. Jiang, Z. Shen, J. Qian, Z. Dan, M. Guo, Y. Lin, C.-W. Nan, L. Chen and Y. Shen, *Energy Storage Materials*, 2019, **18**, 213-221.
23. X. Ren, N. Meng, H. Yan, E. Bilotti and M. J. Reece, *Polymer*, 2019, **168**, 246-254.
24. Z. Zhou, J. Carr, M. Mackey, K. Yin, D. Schuele, L. Zhu and E. Baer, *J. Polym. Sci., Part B: Polym. Phys.*, 2013, **51**, 978-991.
25. X. Chen, J.-K. Tseng, I. Treufeld, M. Mackey, D. E. Schuele, R. Li, M. Fukuto, E. Baer and L. Zhu, *J. Mater. Chem. C*, 2017, **5**, 10417-10426.

26. K. Yin, Z. Zhou, D. E. Schuele, M. Wolak, L. Zhu and E. Baer, *ACS Appl. Mater. Interfaces*, 2016, **8**, 13555-13566.
27. H. Zhu, Z. Liu and F. Wang, *JMatS*, 2017, **52**, 5048-5059.
28. B. Luo, X. Wang, H. Wang, Z. Cai and L. Li, *Composites Sci. Technol.*, 2017, **151**, 94-103.
29. J.-K. Tseng, K. Yin, Z. Zhang, M. Mackey, E. Baer and L. Zhu, *Polymer*, 2019, **172**, 221-230.
30. X. Zhang, Y. Shen, B. Xu, Q. Zhang, L. Gu, J. Jiang, J. Ma, Y. Lin and C.-W. Nan, *Adv. Mater.*, 2016, **28**, 2055-2061.
31. J. Jiang, X. Zhang, Z. Dan, J. Ma, Y. Lin, M. Li, C.-W. Nan and Y. Shen, *ACS Appl. Mater. Interfaces*, 2017, **9**, 29717-29731.
32. P. Hu, S. Gao, Y. Zhang, L. Zhang and C. Wang, *Composites Sci. Technol.*, 2018, **156**, 109-116.
33. H. Tang and H. A. Sodano, *Nano Lett.*, 2013, **13**, 1373-1379.
34. R. Su, Z. Luo, D. Zhang, Y. Liu, Z. Wang, J. Li, J. Bian, Y. Li, X. Hu, J. Gao and Y. Yang, *The Journal of Physical Chemistry C*, 2016, **120**, 11769-11776.
35. Y. Wang, J. Cui, Q. Yuan, Y. Niu, Y. Bai and H. Wang, *Adv. Mater.*, 2015, **27**, 6658-6663.
36. Y. Wang, J. Cui, L. Wang, Q. Yuan, Y. Niu, J. Chen, Q. Wang and H. Wang, *J. Mater. Chem. A*, 2017, **5**, 4710-4718.
37. Y. Wang, L. Wang, Q. Yuan, J. Chen, Y. Niu, X. Xu, Y. Cheng, B. Yao, Q. Wang and H. Wang, *Nano Energy*, 2018, **44**, 364-370.
38. Q. Li, G. Zhang, F. Liu, K. Han, M. R. Gadinski, C. Xiong and Q. Wang, *Energy & Environmental Science*, 2015, **8**, 922-931.
39. Z. Bao, C. Hou, Z. Shen, H. Sun, G. Zhang, Z. Luo, Z. Dai, C. Wang, X. Chen and L. Li, *Adv. Mater.*, 2020, 1907227.
